# Supplementary material for: Tunable hydrogel networks by varying secondary structures of hydrophilic peptoids provide viable 3D cell culture platforms for hMSCs
Source: Royal Society of Chemistry journal article supplement (doi:10.1039/d5bm00433k), 2025-01-01
Supplement: d5bm00433k1.pdf [file d5bm00433k1.pdf]

# **Tunable hydrogel networks by varying secondary structure of hydrophilic peptoids provide viable 3D cell culture platforms for hMSCs**

**Aldaly Pineda-Hernandez<sup>1†</sup>, David A. Castilla-Casadiegos<sup>1†</sup>, Logan D. Morton<sup>1†</sup>, Sebastian Giordano<sup>1</sup>, Kathleen N. Halwachs<sup>1</sup>, and Adrienne M. Rosales<sup>1\*</sup>**

**APH, DACC, and LDM contributed equally to this work.**

<sup>1</sup>McKetta Department of Chemical Engineering, University of Texas at Austin, Austin, TX, 78712

\*Corresponding author: Adrienne M. Rosales, McKetta Department of Chemical Engineering, University of Texas at Austin, Austin, TX, USA. E-mail: arosales@che.utexas.edu

## **Supplemental Information**

|                                                                                    |    |
|------------------------------------------------------------------------------------|----|
| Figure S1. Analytical HPLC and LC-MS of hydrophobic peptoids                       | 2  |
| Figure S2. Analytical HPLC and LC-MS of hydrophilic peptoids                       | 3  |
| Figure S3. Analytical HPLC and LC-MS of cell adhesive and control peptides         | 4  |
| Figure S4. <sup>1</sup> H NMR of Norbornene-functionalized hyaluronic acid (NorHA) | 5  |
| Figure S5. PBS solubility side views of each synthesized peptoid at 15 mM.         | 6  |
| Figure S6. Thiol percentages of crosslinkers                                       | 7  |
| Table S1. Hydrogel formulation details                                             | 7  |
| Figure S7. Comparison of Storage Moduli with and without Ellman's correction       | 8  |
| Figure S8. Gel fraction of all hydrogels                                           | 9  |
| Figure S9. Calculated swollen moduli of all hydrogels                              | 10 |
| Section S.1 Statistical Analyses                                                   | 11 |

**A****H14-DHP** –  $M_{\text{theo}}$ : 2209.5 Da**N14-DHP** –  $M_{\text{theo}}$ : 2209.5 Da**U14-DHP** –  $M_{\text{theo}}$ : 1384.7 Da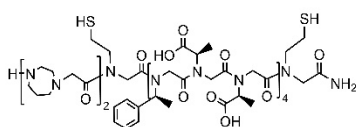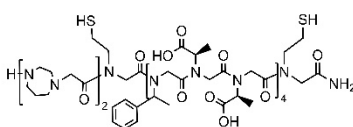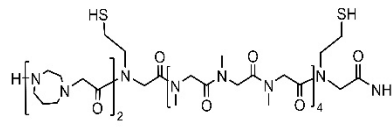**B**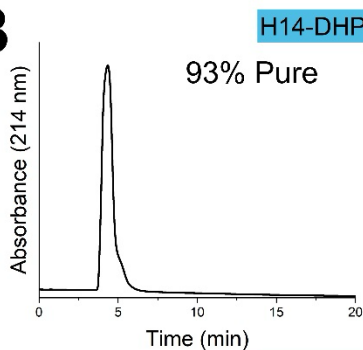**C**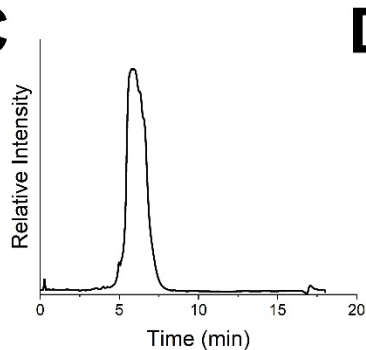**D**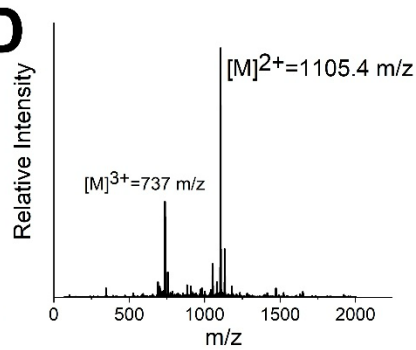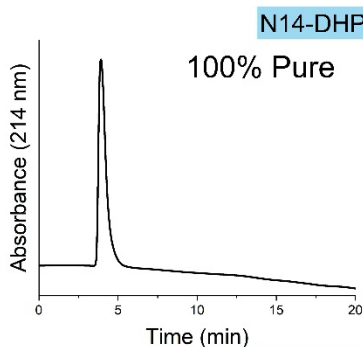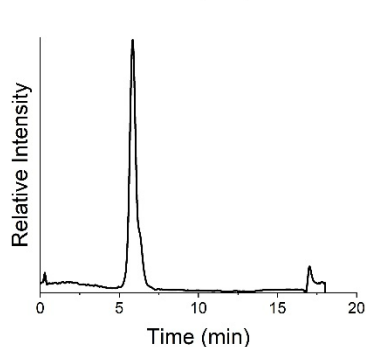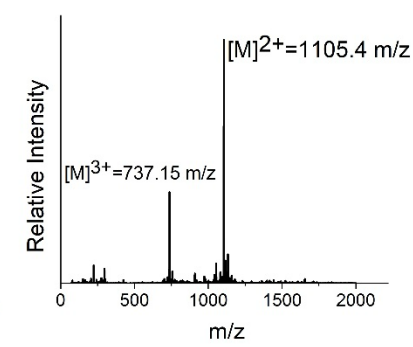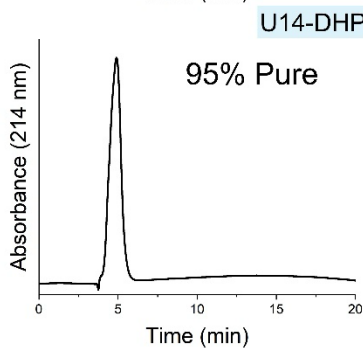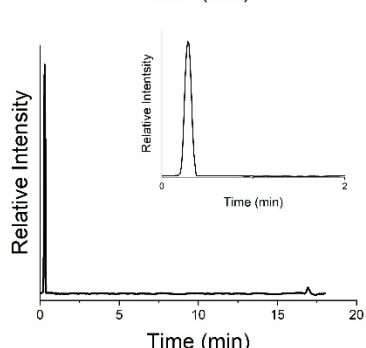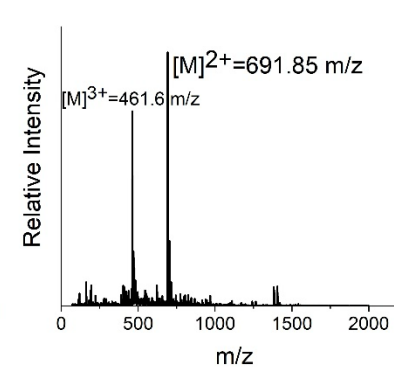

**Figure S1.** A) Structure of each peptoid and their theoretical masses. All hydrophilic peptoids were confirmed to be highly pure and monodisperse by B) analytical HPLC (left) monitored at 214 nm, and C) mass spectrometry of positive mode ionization (0-2000  $m/z$ ). D) ES-API mass spectrum (right) was obtained by integrating over the whole retention time of the mass chromatogram.

**A****H14** –  $M_{\text{theo}}$ : 1929.9 Da**H14-pip** –  $M_{\text{theo}}$ : 2055.3 Da**H14-hp** –  $M_{\text{theo}}$ : 2060.3 Da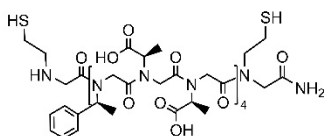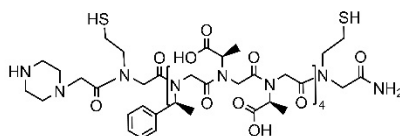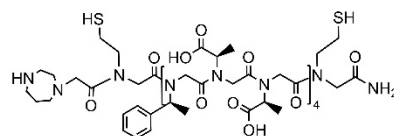**B**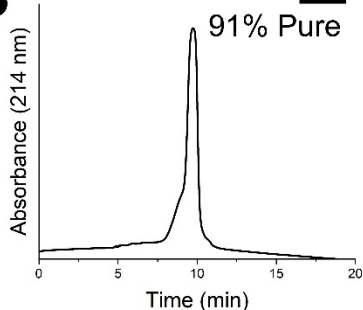**C**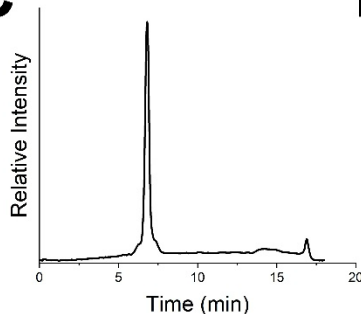**D**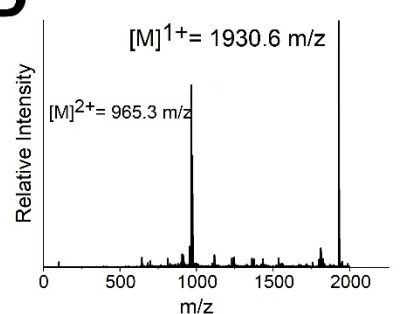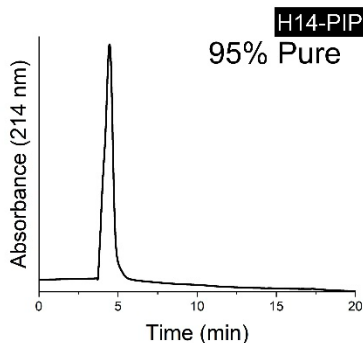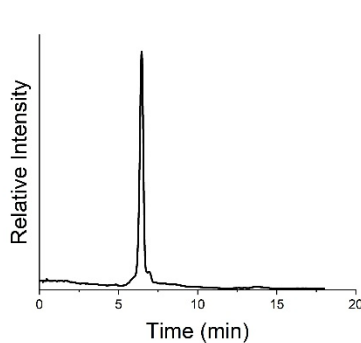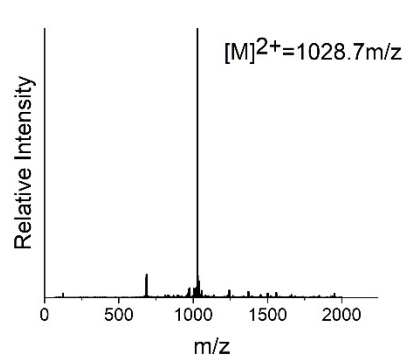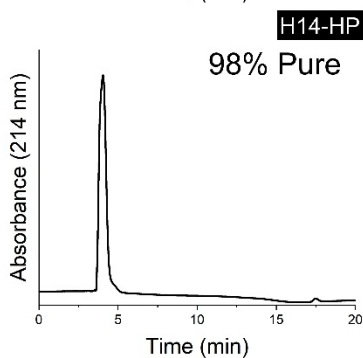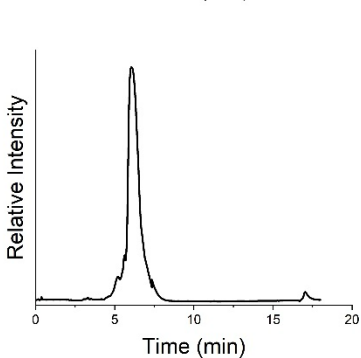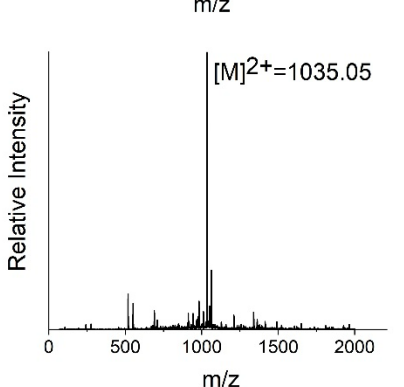

**Figure S2.** A) Structure of each peptoid and their theoretical masses. All hydrophilic peptoids were confirmed to be highly pure and monodisperse by B) analytical HPLC (left) monitored at 214 nm, and C) mass spectrometry of positive mode ionization (0-2000 m/z). D) ES-API mass spectrum (right) was obtained by integrating over the whole retention time of the mass chromatogram.

**A****Peptide crosslinker control –  $M_{\text{theo}}$ : 1303.5 Da**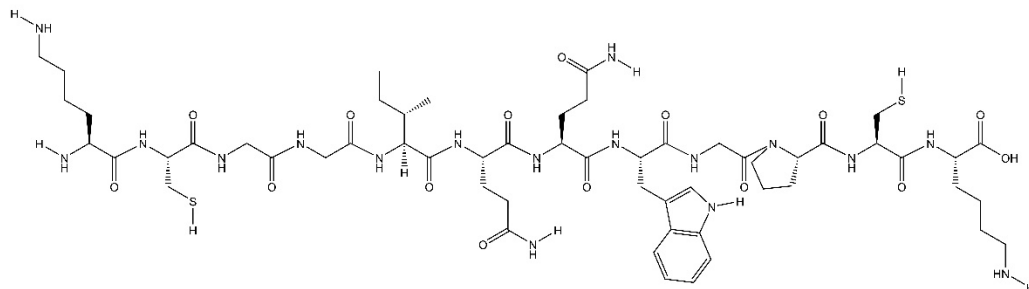**Cell adhesive peptide –  $M_{\text{theo}}$ : 1025.06 Da**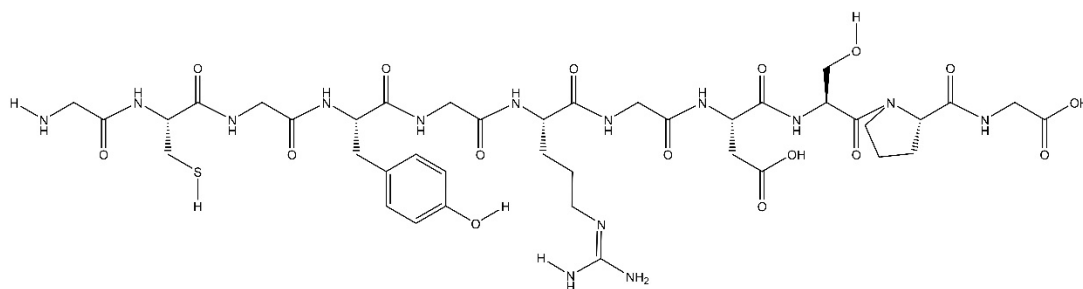**B**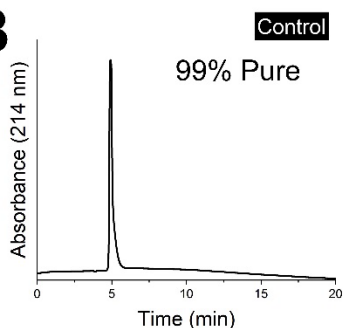**C**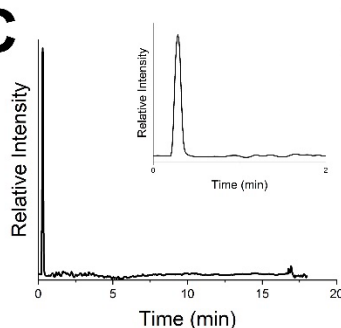**D**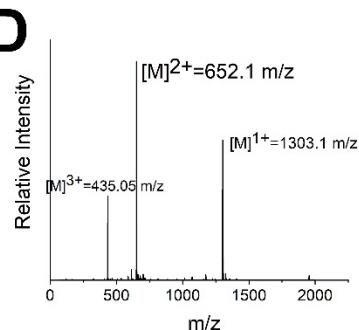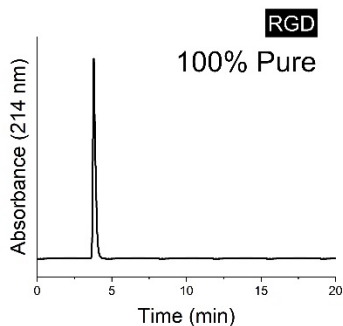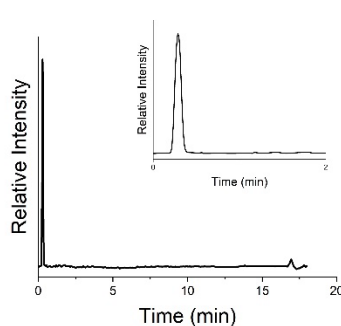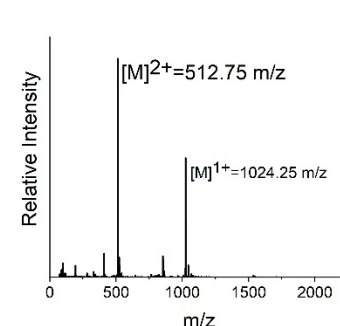

**Figure S3.** A) Structure of each peptide and their theoretical masses. Both peptides were confirmed to be highly pure and monodisperse by B) analytical HPLC (left) monitored at 214 nm, and C) mass spectrometry (center) of positive mode ionization (0-2000 m/z). D) ES-API mass spectrum (right) was obtained by integrating over the whole retention time of the mass chromatogram.

**A**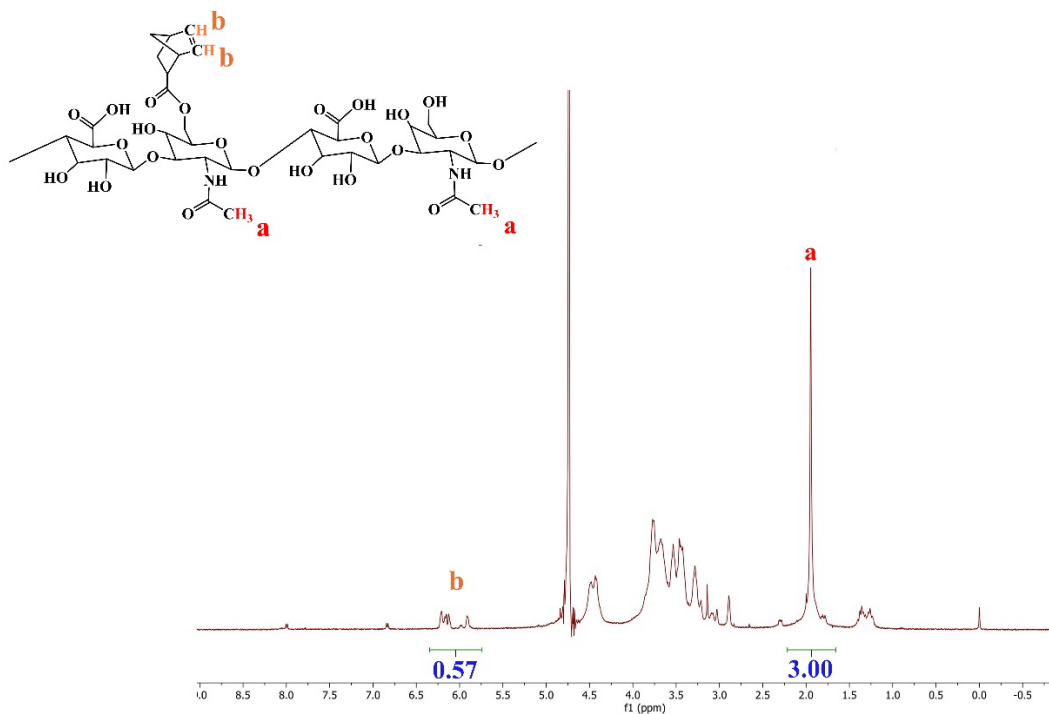**B**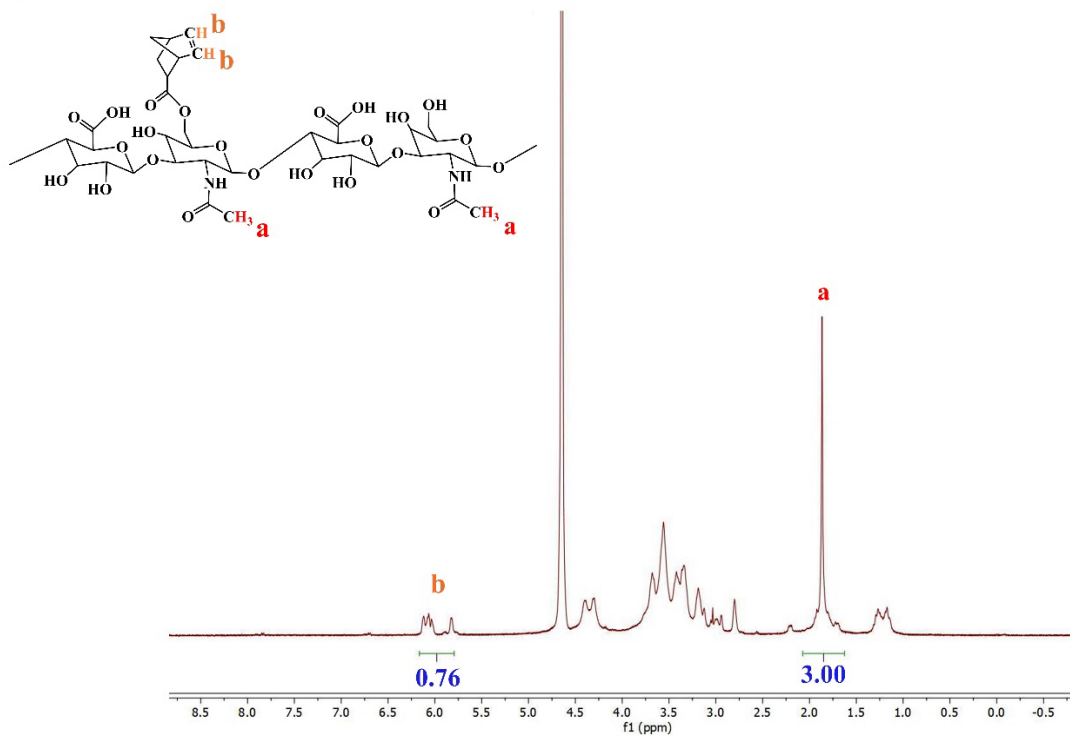

**Figure S4.** Norbornene-functionalized hyaluronic acid (NorHA) was synthesized to an approximate functionalization of: A) ~28% as confirmed by  $^1\text{H}$  NMR for the first batch and B) ~38% as confirmed by  $^1\text{H}$  NMR for the second batch.

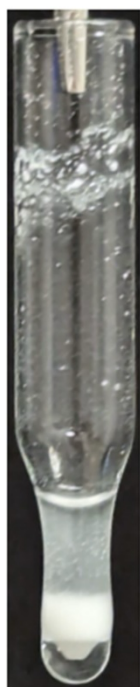

**H14**

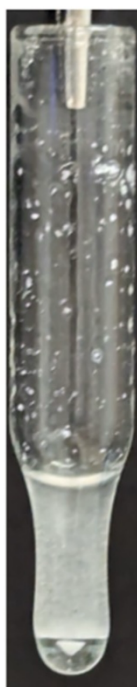

**H14-pip**

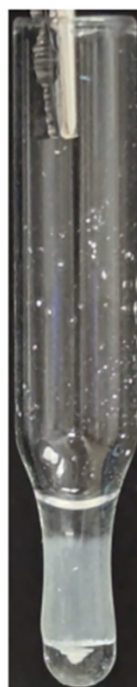

**H14-hp**

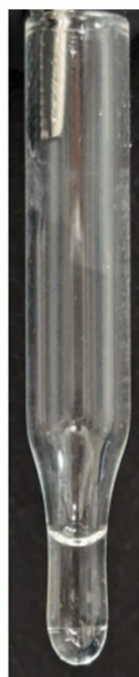

**H14-DHP**

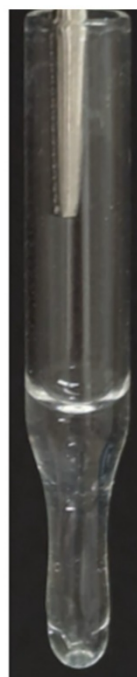

**N14-DHP**

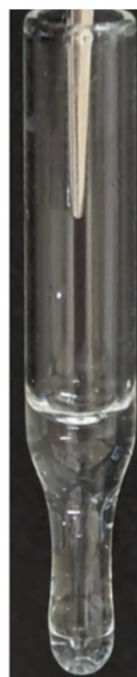

**U14-DHP**

**Figure S5.** PBS solubility side views of each synthesized peptoid at 15 mM.

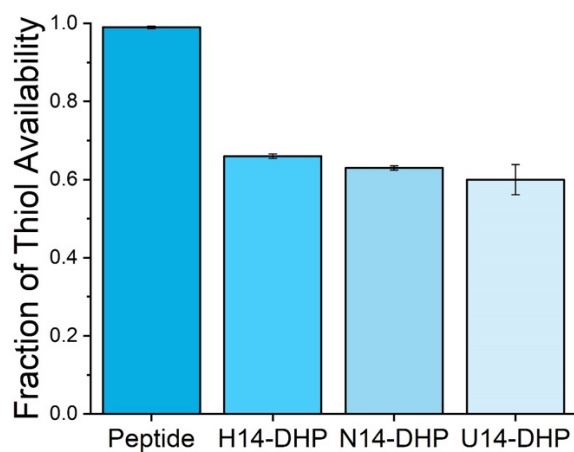

**Figure S6.** Free thiol content for the peptide control and all hydrophilic peptoids, as measured by Ellman's assay.

**Table S1.** Hydrogel formulation details.

| Hydrogel Condition | mg/mL of HA | Concentration of norbornenes (mM) | LAP photoinitiator wt % | Cell adhesive peptide (mM) | Ellman's adjustment % | Concentration of thiols in hydrogel (mM) | Concentration of crosslinker in hydrogel (mM) |
|--------------------|-------------|-----------------------------------|-------------------------|----------------------------|-----------------------|------------------------------------------|-----------------------------------------------|
| Control (Peptide)  | 30          | 20.16                             | 0.05                    | 2                          | 99                    | 20.16                                    | 10.18                                         |
| H14-DHP            | 30          | 20.16                             | 0.05                    | 2                          | 66                    | 20.16                                    | 15.27                                         |
| N14-DHP            | 30          | 20.16                             | 0.05                    | 2                          | 60                    | 20.16                                    | 16.79                                         |
| U14-DHP            | 30          | 20.16                             | 0.05                    | 2                          | 60                    | 20.16                                    | 16.79                                         |

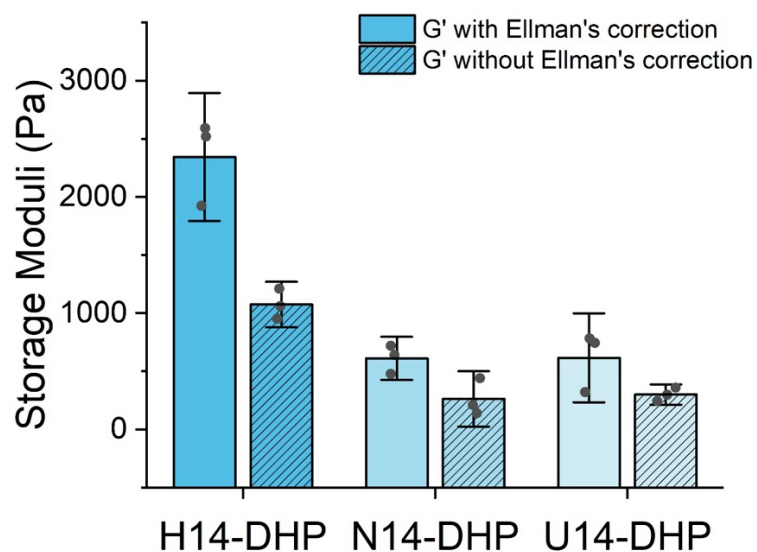

**Figure S7.** Storage moduli of all hydrogel conditions showing that when crosslinker amount is adjusted using Ellman's correction, elastically effective linkages are added, causing an increase in storage moduli compared to when there is not Ellman's correction.



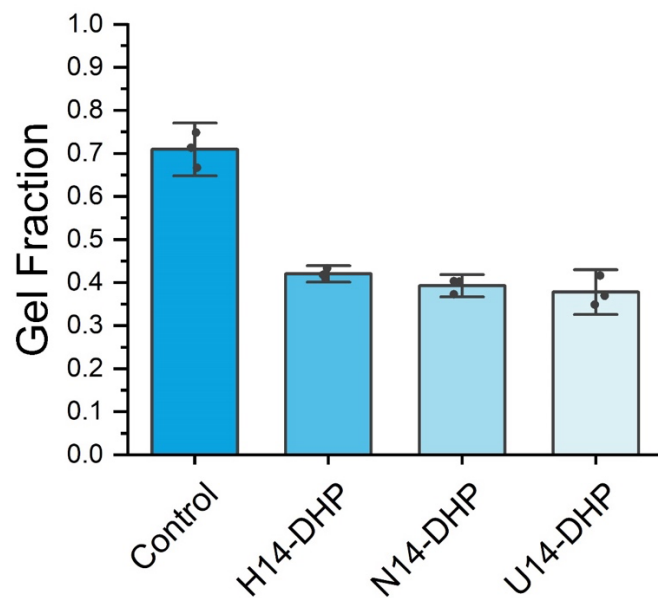

**Figure S8.** Gel fraction results indicating that a similar degree of crosslinking is obtained for the peptoid-crosslinked hydrogels whereas the peptide control hydrogels have a higher degree of crosslinking.

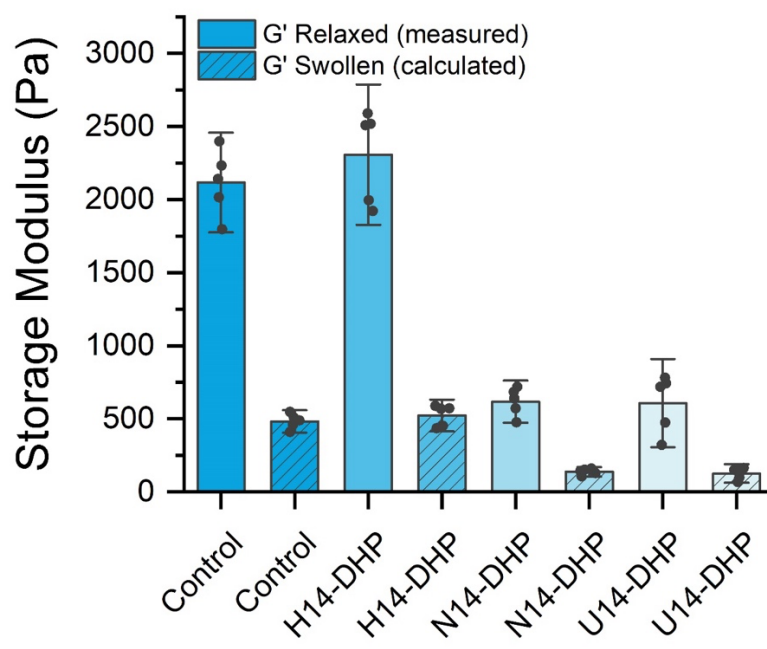

**Figure S9.** Calculated swollen storage modulus compared to the measured relaxed state modulus for each hydrogel condition.

### **Statistical Analyses to Validate the use of ANOVA:**

To validate the use of ANOVA, it is essential to ensure that key assumptions—normality and homogeneity of variances—are met. The Shapiro-Wilk test is commonly used to assess the normality of residuals within each group. It tests the null hypothesis that the data are drawn from a normal distribution. The test returns a W statistic, where values closer to 1 suggest normality, and a p-value, where a value greater than the chosen significance level (typically  $\alpha = 0.05$ ) indicates no significant deviation from normality, thus supporting the assumption. In parallel, Levene's test evaluates the homogeneity of variances across groups by testing the null hypothesis that all group variances are equal. It computes an F statistic by comparing the absolute deviations of group observations from their group means (or medians), and provides a corresponding p-value; a value greater than  $\alpha$  suggests that variances are not significantly different between groups, justifying the use of ANOVA. When both tests yield non-significant p-values, it supports the validity of ANOVA assumptions and justifies proceeding with the analysis.

The Kruskal–Wallis test is a non-parametric alternative to ANOVA used when the assumptions of normality and homogeneity of variances are violated. Unlike ANOVA, which compares means across groups under the assumption of normally distributed data with equal variances, the Kruskal–Wallis test compares the medians by ranking all data points across groups and analyzing the distribution of these ranks. It tests the null hypothesis that all groups come from the same distribution. The test produces an H statistic (which approximates a chi-square distribution) and a corresponding p-value. A significant p-value (typically  $p < 0.05$ ) suggests that at least one group differs significantly from the others. This test does not require the data to be normally distributed and is less sensitive to unequal variances, making it particularly useful when either the Shapiro-Wilk test indicates non-normality or Levene's test shows significant heterogeneity of variances. Thus, the Kruskal–Wallis test serves as a robust alternative to ANOVA when parametric assumptions are not met.

**Transmittance Data:****Shapiro-Wilk Test Results**

| <b>Group</b>   | <b>W-statistic</b> | <b>p-value</b>      |
|----------------|--------------------|---------------------|
| <b>H14</b>     | 0.80671137571      | 0.13062232732772827 |
| <b>H14-pip</b> | 0.77185916900      | 0.04895104467868805 |
| <b>H14-hp</b>  | 0.90050262212      | 0.38710227608680725 |
| <b>H14-DHP</b> | 0.81815469264      | 0.15861836075782776 |
| <b>N14-DHP</b> | 0.97126692533      | 0.6746912002563477  |

**Levene's Test Results**

- Statistic: 0.700
- p-value: 0.634

**Kruskal-Wallis Results**

- Statistic: 15.34
- p-value: 0.0090

### **Solubility Data:**

#### **Shapiro-Wilk Test Results**

| <b>Group</b>   | <b>W-statistic</b> | <b>p-value</b>      |
|----------------|--------------------|---------------------|
| <b>H14</b>     | 0.9795919060707092 | 0.7262256145477295  |
| <b>H14-pip</b> | 0.9758065938949585 | 0.7017236948013306  |
| <b>H14-hp</b>  | 0.9758065938949585 | 0.7017236948013306  |
| <b>H14-DHP</b> | 1                  | 0.999999            |
| <b>N14-DHP</b> | 0.8352554440498352 | 0.201774            |
| <b>U14-DHP</b> | 0.882641           | 0.33219894766807556 |

#### **Levene's Test Results**

- Statistic: 0.742
- p-value: 0.607

### **Plateau Modulus Data:**

#### **Shapiro-Wilk Test Results**

| <b>Group</b>   | <b>W-statistic</b> | <b>p-value</b>      |
|----------------|--------------------|---------------------|
| <b>Control</b> | 0.9928879141807556 | 0.9887659549713135  |
| <b>H14-DHP</b> | 0.7926778197288513 | 0.070536            |
| <b>N14-DHP</b> | 0.9522148370742798 | 0.7529988884925842  |
| <b>U14-DHP</b> | 0.8556444644927979 | 0.21302825212478638 |

#### **Levene's Test Results**

- Statistic: 0.702
- p-value: 0.565

### **Swelling Data:**

#### **Shapiro-Wilk Test Results**

| <b>Group</b>   | <b>W-statistic</b> | <b>p-value</b>     |
|----------------|--------------------|--------------------|
| <b>Control</b> | 0.8853664398193359 | 0.3403282165527344 |
| <b>H14-DHP</b> | 0.9774535298347473 | 0.7121354341506958 |
| <b>N14-DHP</b> | 0.9994819760322571 | 0.9565268158912659 |
| <b>U14-DHP</b> | 0.9998378157615662 | 0.9756718277931213 |

#### **Levene's Test Results**

- Statistic: 0.963
- p-value: 0.456

## **EdU Data**

### **Shapiro-Wilk Test Results**

| <b>Group</b>   | <b>W-statistic</b> | <b>p-value</b>      |
|----------------|--------------------|---------------------|
| <b>Control</b> | 0.9891335964202881 | 0.952988            |
| <b>H14-DHP</b> | 0.8104616403579712 | 0.12234412878751755 |
| <b>N14-DHP</b> | 0.8547564744949341 | 0.24193963408470154 |
| <b>U14-DHP</b> | 0.7593454122543335 | 0.047059            |

### **Levene's Test Results**

- Statistic: 0.508
- p-value: 0.684

### **Kruskal-Wallis Results**

- Statistic: 11.54
- p-value: 0.0092



## **YAP Nuclear Localization Data**

### **Shapiro-Wilk Test Results**

| <b>Group</b>   | <b>W-statistic</b> | <b>p-value</b>      |
|----------------|--------------------|---------------------|
| <b>Control</b> | 0.9720840454101562 | 0.7786327600479126  |
| <b>H14-DHP</b> | 0.9036558270454407 | 0.041219            |
| <b>U14-DHP</b> | 0.9453017711639404 | 0.27684009075164795 |

### **Levene's Test Results**

- Statistic: 3.50
- p-value: 0.036

### **Kruskal-Wallis Results:**

- **Statistic:** 37.42
- **p-value:**  $7.50 \times 10^{-9}$

## **IDO Data (no IFN- $\gamma$ )**

### **Shapiro-Wilk Test Results**

| <b>Group</b>   | <b>W-statistic</b> | <b>p-value</b>     |
|----------------|--------------------|--------------------|
| <b>Control</b> | 0.9929120540618896 | 0.971877           |
| <b>H14-DHP</b> | 0.7535684108734131 | 0.041689           |
| <b>U14-DHP</b> | 0.93982            | 0.6532316207885742 |

### **Levene's Test Results**

- Statistic: 1.07
- p-value: 0.383

### **Kruskal-Wallis Results**

- Statistic: 8.00
- p-value: 0.0183

## **IDO Data (with IFN- $\gamma$ )**

### **Shapiro-Wilk Test Results**

| <b>Group</b>   | <b>W-statistic</b> | <b>p-value</b>  |
|----------------|--------------------|-----------------|
| <b>Control</b> | 0.884792566299438  | 0.3386097550392 |
| <b>H14-DHP</b> | 0.862245082855224  | 0.2737730443477 |
| <b>U14-DHP</b> | 0.990825712680816  | 0.8167866468429 |

### **Levene's Test Results**

- Statistic: 0.0038
- p-value: 0.996
